# Supplementary material for: Development of a Sinitic Clubroot Differential Set for the Pathotype Classification of Plasmodiophora brassicae
Source: Front Plant Sci. 2020 Aug 31;11:568771. doi: 10.3389/fpls.2020.568771 (PMC7488845; doi:10.3389/fpls.2020.568771)
Supplement: Supplementary file 3 [file Table_3.xlsx]

## Sheet: Sheet1
Table S3.The detail information of mean disease index and pathotype identification of Plasmodiophora brassicae isolates according to Williams’ and/or Sinitic clubroot differential set.
		Williams’ differential systema					Sinitic clubroot differential set
Number	Isolates	JQ	BS	LT	WB	Pathotypeb	H01	H02	H03	H04	H05	H06	H07	H08	H09	Pathotypec
1	AHHS-63	74.36	91.67	66.67	0	2	0	0	0	0	0	0	0	5.26	90.2	Pb1
2	LNBX-10	63	83.33	82.61	7.9	2(2)	0	0	0	0	0	0	0	0	100	Pb1
3	LNBX-11	90	68	86	23	2	0	0	0	0	0	0	0	0	95	Pb1
4	LAB-7	85	79	70	11	2	0	0	0	0	0	0	0	0	100	Pb1
5	JSLYG-87	90.48	88.24	88.89	0	2	0	0	0	0	0	0	0	0	100	Pb1
6	SCXC-60	75	78.33	25	44.74	2	0	0	10.53	11.11	85.42	0	0	0	93.75	Pb5
7	AHHS-62	76.92	76.47	71.43	33.33	4	0	0	0	0	0	0	0	0	90.91	Pb1
8	AHHS-66	61.5	77.78	86.7	67.5	4	0	0	0	0	0	0	0	0	100	Pb1
9	HBES-25	57.71	95.31	93.18	100	4	0	0	0	0	0	0	0	0	100	Pb1
10	HBSY-42	50	100	75.44	100	4	0	0	0	0	0	0	13.33	0	100	Pb1
11	HBYC-27	30	100	86.84	75	4	0	0	0	0	0	0	6.67	0	100	Pb1
12	SCPZ-14	100	90.63	93.75	80.26	4(7)	0	0	0	0	0	0	0	0	87.72	Pb1
13	LNXM-17	100	75	40	75	4 (4)	0	0	0	0	0	0	0	0	91.67	Pb1
14	SCXC-6	86.67	86.36	100	83.33	4 (10)	0	0	0	0	2.15	0	0	0	92.98	Pb1
15	LNXM-8	10	73.33	100	60.53	4(4)	0	0	0	0	0	0	0	0	81.25	Pb1
16	SCDY-57	32.35	86.54	76.67	76.25	4	0	7.14	0	0	0	0	0	0	92.31	Pb1
17	SXHZ-73	100	94	85	90	4	0	0	0	0	0	0	0	0	90.91	Pb1
18	SCPZ-53	26	35	41	28	4	0	0	0	0	0	0	6.06	0	100	Pb1
19	SCXC-18	76.79	75	100	58.33	4	0	0	0	0	10	5.56	0	0	100	Pb1
20	LAB-4	100	90	78.79	100	4	0	0	0	0	0	0	0	0	91.67	Pb1
21	LAB-9	78.57	100	80.7	31.25	4	0	0	0	0	0	0	0	0	86.27	Pb1
22	LAB-19	93.06	80	88.89	73.61	4	0	0	0	0	0	0	0	71.57	100	Pb2
23	LNND-2	93.18	77.78	100	91.67	4	0	0	0	0	0	0	87.3	7.14	100	Pb3
24	SCCD-52	67.19	90.91	100	98.44	4	0	0	0	0	0	0	88.41	0	100	Pb3
25	LNSY-16	54.55	79.7	93.33	89.71	4 (11)	0	0	0	0	82.61	83.3	6.67	0	100	Pb4
26	SXHZ-72	33	67	80	84	4	0	0	0	0	84.23	0	0	0	100	Pb5
27	YNDL-86	22.22	55.56	27.78	52	4	0	4.35	4	78.26	66.67	0	0	0	88.41	Pb6
28	LAB-3	100	100	78.79	100	4	0	0	93.33	0	0	0	0	0	100	Pb7
29	YNCX-77	93.75	72.22	85.29	88.89	4	0	0	87.3	79.7	66.67	0	0	0	86.67	Pb8
30	YNTC-75	96.43	100	100	100	4	0	0	62.5	84.61	86.67	0	0	0	100	Pb8
31	LAB-5	66.67	37.5	93.33	73.53	4	0	83.3	80.7	78.21	0	0	0	0	93.94	Pb9
32	YNTC-74	80	89	92	69	4	0	61.54	100	84.62	0	0	0	0	100	Pb9
33	HBHSP-91	93.06	80	88.89	73.61	4	86.11	96.33	100	87.88	9.26	0	0	0	83.33	Pb10
34	HBBY-30	100	100	100	91.67	4	0	30	40	88.89	62.5	31.58	0	0	100	Pb11
35	HBLC-31	58.33	62.5	0	0	7	0	0	0	0	0	0	0	0	82.22	Pb1
36	SCPZH-59	46.67	46.15	3.85	0	7	0	0	0	0	0	0	0	0	90.2	Pb1
37	HBSY-32	11.36	84.72	100	84.72	11	0	0	0	0	0	0	18.75	0	89.58	Pb1
Note: a JQ=Jersey Queen; BS=Badger shipper; LT=Laurentian; WB=Wilhelmsburger;b The numbers in brackets represent the pathotype identified by Shen et al(2009); c Pathotype classfication according to Sinitic clubroot differential set.

## Sheet: Sheet2
Table S3.The detail information of mean disease index and pathotype identification of Plasmodiophora brassicae isolates according to Sinitic clubroot differential set.
Sinitic clubroot differential set
Number	Isolates	H01	H02	H03	H04	H05	H06	H07	H08	H09	Pathotypec
38	AHCZ-67	0	0	0	0	0	0	0	0	93.06	Pb1
39	AHHS-153	6.25	0	12.82	0	0	0	7.14	0	96.08	Pb1
40	AHHS-154	0	0	2.38	0	7.84	1.67	0	0	84.61	Pb1
41	AHHS-155	0	0	0	0	0	0	0	0	100	Pb1
42	AHHS-156	0	0	2.08	0	0	0	0	0	94.44	Pb1
43	AHHS-158	9.8	0	0	0	0	1.59	0	0	82.22	Pb1
44	AHHS-64	0	0	0	0	0	0	0	0	83.33	Pb1
45	AHXC-68	0	0	0	0	0	0	0	0	100	Pb1
46	AHXC-70	0	0	11.11	1.85	2.56	0	0	0	100	Pb1
47	CQNC-142	8.33	0	0	0	0	0	0	0	100	Pb1
48	CQNC-143	0	0	0	0	16.67	0	20.83	0	100	Pb1
49	CQPL-100	0	0	0	0	16.67	0	0	0	100	Pb1
50	CQPL-101	0	0	0	0	0	0	0	0	100	Pb1
51	GZAS-122	0	5	10.53	3.33	8.33	1.75	0	0	88.89	Pb1
52	HLJHEB-105	0	0	0	0	3.7	0	3.33	0	92.16	Pb1
53	HNHY-152	3.33	0	0	0	0	0	20.63	0	89.39	Pb1
54	JLLY-124	0	0	0	0	0	0	0	0	100	Pb1
55	JLMHK-127	0	0	0	0	0	0	0	0	100	Pb1
56	JLMHK-128	0	0	0	0	0	0	0	0	100	Pb1
57	JLTH-116	0	0	0	0	0	0	0	0	100	Pb1
58	JLTH-117	0	0	0	0	7.4	0	0	0	100	Pb1
59	JLTH-121	0	0	0	6.06	0	0	0	0	100	Pb1
60	JLYB-107	0	0	0	0	0	0	0	0	92.59	Pb1
61	JLYB-118	0	0	0	0	9.09	0	0	0	84.85	Pb1
62	JSLYG-139	0	0	0	8.33	0	0	0	0	100	Pb1
63	LAB-15	0	0	0	0	0	0	14.28	0	88.89	Pb1
64	LNDL-108	0	0	0	0	9.09	0	0	0	87.5	Pb1
65	LNDL-120	0	0	0	0	0	0	0	0	92.59	Pb1
66	LNDL-125	0	0	0	0	9.09	0	0	0	100	Pb1
67	LNFS-115	0	0	0	0	7.4	0	0	0	100	Pb1
68	LNHLD-126	0	0	0	0	0	0	0	0	100	Pb1
69	SCCD-129	7.41	0	0	0	0	0	0	0	95.83	Pb1
70	SCCD-130	0	0	0	0	0	0	0	0	91.67	Pb1
71	SCCD-131	0	0	0	0	0	0	0	0	100	Pb1
72	SCCD-161	0	1.75	0	0	0	0	0	0	84.62	Pb1
73	SCCD-163	0	0	0	0	0	0	16.67	0	100	Pb1
74	SCCD-94	0	0	0	0	0	0	0	0	87.5	Pb1
75	SCCD-94-1	0	0	19.61	0	0	0	11.59	0	82.05	Pb1
76	SCDY-165	0	0	0	0	1.59	0	3.03	0	100	Pb1
77	SCGH-141	0	0	1.85	3.33	0	0	1.85	0	85.96	Pb1
78	SCGH-92	0	0	0	0	0	0	0	0	82.05	Pb1
79	SCMS-58	0	0	0	0	6.25	0	0	0	95	Pb1
80	SCPX-54	0	0	0	0	5.56	0	0	0	86.11	Pb1
81	SCPZ-53-1	0	0	0	0	0	0	7.41	0	100	Pb1
82	SCPZ-53-2	3.51	0	0	0	16.67	0	1.85	0	81.48	Pb1
83	SXBJ-138	0	0	0	0	0	0	0	0	100	Pb1
84	SXBJ-136	0	0	0	0	16.67	20	0	0	90.91	Pb1
85	SXHZ-71	0	0	0	0	0	0	3.33	0	100	Pb1
86	YNDH-82	0	0	0	0	0	0	0	0	83.33	Pb1
87	YNTC-85	0	0	0	0	8.33	0	0	0	100	Pb1
88	YNTC-96	0	0	0	0	0	0	0	0	100	Pb1
89	SCCD-170	5	0	0	0	0	2.78	0	0	100	Pb1
90	SCCD-148	0	0	0	0	0	0	0	0	85.71	Pb1
91	HBJM-178	0	0	0	0	0	0	0	0	100	Pb1
92	HBJZ-177	0	0	0	0	0	0	2.38	0	100	Pb1
93	HBJZ-175	0	0	0	0	0	0	0	0	91.67	Pb1
94	HBJM-179	0	0	19.05	0	5.13	0	0	0	100	Pb1
95	HBYC-182	0	0	0	0	11.11	12.12	8.33	0	100	Pb1
96	HBZJ-172	0	0	0	0	0	0	0	0	93.75	Pb1
97	HBZJ-173	0	0	0	0	0	0	0	0	100	Pb1
98	HBZJ-174	0	0	0	0	0	0	3.51	0	100	Pb1
99	HBZJ-28	5.56	0	11.76	0	0	17.65	88.1	16.67	100	Pb3
100	HNHH-160	5.26	0	11.76	0	5	0	91.36	0	91.67	Pb3
101	KGN-24	9.09	0	0	0	8.33	0	84.31	0	100	Pb3
102	SCCD-166	0	0	0	0	0	0	81.25	0	100	Pb3
103	SCGH-132-1	0	0	0	0	0	0	74.24	0	100	Pb3
104	SCMS-164	18.52	0	0	0	0	0	70.37	0	100	Pb3
105	SXBJ-133	0	0	0	0	0	0	85.19	0	100	Pb3
106	LNXM-1	0	0	0	0	100	100	6.67	0	100	Pb4
107	CQNC-144	0	0	0	0	93.33	89.86	0	0	97.62	Pb4
108	HLJHEB-111	0	0	0	0	59.26	48.48	0	0	91.67	Pb4
109	HLJMDJ-106	0	0	0	0	100	100	0	0	100	Pb4
110	HNNY-140	0	0	0	0	100	100	0	0	100	Pb4
111	JLLT-113	0	0	0	0	100	61.11	0	8.33	100	Pb4
112	JLLT-114	0	0	0	10	94.44	91.67	0	0	100	Pb4
113	JLSP-112	0	0	0	0	81.82	87.88	14.29	0	90	Pb4
114	JLYB-119	0	3.03	0	0	86.11	100	0	9.52	100	Pb4
115	LNKY-109	0	0	0	0	96.97	100	0	0	100	Pb4
116	LNKY-110	0	0	0	0	100	100	8.33	0	100	Pb4
117	YNLC-83	0	0	0	0	85	93	0	0	84.62	Pb4
118	SXBJ-134	0	0	0	0	66.67	84	0	0	100	Pb4
119	AHHS-65	0	0	0	0	88.89	0	0	0	100	Pb5
120	SXBJ-150	0	0	0	0	92.86	0	0	0	100	Pb5
121	SXBJ-149	0	5.88	0	13.04	86.11	6.25	0	7.14	85.19	Pb5
122	YNLC-145	0	0	0	0	82.05	1.67	0	0	92.3	Pb5
123	KBL-22	12.07	0	0	0	88.89	0	0	0	100	Pb5
124	YNLC-97	0	10.53	0	72.54	80	3.33	0	0	82.46	Pb6
125	HBHN-29	0	0	92.59	0	0	0	0	0	100	Pb7
126	HBJM-180	0	0	88.89	0	8.89	0	0	0	100	Pb7
127	SXTB-104	0	0	66.67	88.89	100	0	0	0	100	Pb8
128	CQPL-99	0	18.18	0	0	4.55	93	0	0	93.48	Pb12
129	CQPL-98	0	3.33	0	84.61	15.15	0	70.58	3.51	86.11	Pb13
130	KEL-23	0	93	0	15.38	100	100	0	0	100	Pb14
131	YNLC-171	0	89.47	86.67	76.47	66.67	0	13.33	2.08	93.33	Pb15
132	KHN-20	0	68.25	6.25	68.74	100	58.33	0	0	100	Pb16
Note: c Pathotype classfication according to Sinitic clubroot differential set.
